# Supplementary material
Source: PubMed Central journal article supplement (PMC9710234)
Supplement: NIHMS1847583-supplement-Supplemental_Material.pdf [file NIHMS1847583-supplement-Supplemental_Material.pdf]

**Supplemental Table 1**

*Means and Standard Deviations for Pre- and Post-Discussion Appraisals, Post-Discussion Emotion and Closeness Ratings, and Skin Conductance Reactivity (SCR) for Each Discussion*

|                    | Own Loss (Narrator) Discussion                |           |              |          |           |              | Partner Loss (Listener) Discussion |           |              |          |           |              | Change Discussion |           |              |          |           |              |
|--------------------|-----------------------------------------------|-----------|--------------|----------|-----------|--------------|------------------------------------|-----------|--------------|----------|-----------|--------------|-------------------|-----------|--------------|----------|-----------|--------------|
|                    | Women                                         |           |              | Men      |           |              | Women                              |           |              | Men      |           |              | Women             |           |              | Men      |           |              |
|                    | <i>M</i>                                      | <i>SD</i> | CI           | <i>M</i> | <i>SD</i> | CI           | <i>M</i>                           | <i>SD</i> | CI           | <i>M</i> | <i>SD</i> | CI           | <i>M</i>          | <i>SD</i> | CI           | <i>M</i> | <i>SD</i> | CI           |
|                    | <b>Pre-discussion Appraisal</b>               |           |              |          |           |              |                                    |           |              |          |           |              |                   |           |              |          |           |              |
| Neg anticipation   | 3.55                                          | 1.12      | [3.27, 3.82] | 2.99     | 1.22      | [2.69, 3.29] | 2.80                               | 1.05      | [2.55, 3.06] | 2.57     | 1.14      | [2.29, 2.85] | 3.20              | 1.13      | [2.92, 3.48] | 2.82     | 1.17      | [2.54, 3.11] |
|                    | <b>Post-discussion Appraisals</b>             |           |              |          |           |              |                                    |           |              |          |           |              |                   |           |              |          |           |              |
| Expressed new info | 2.11                                          | 1.26      | [1.80, 2.42] | 2.22     | 1.24      | [1.92, 2.53] | 1.45                               | 1.25      | [1.14, 1.76] | 1.50     | 1.21      | [1.21, 1.80] | 1.61              | 1.06      | [1.34, 1.87] | 1.71     | 1.15      | [1.43, 1.99] |
| Learned new info   | 1.37                                          | 1.17      | [1.08, 1.66] | 1.29     | 1.20      | [.99, 1.58]  | 2.44                               | 1.18      | [2.15, 2.73] | 2.22     | 1.24      | [1.92, 2.53] | 1.71              | 1.05      | [1.45, 1.97] | 1.72     | 1.17      | [1.43, 2.01] |
| Similarity         | 1.84                                          | 1.28      | [1.53, 2.16] | 2.10     | 1.31      | [1.77, 2.42] | 1.99                               | 1.27      | [1.68, 2.30] | 2.22     | 1.26      | [1.91, 2.53] | 2.90              | 1.09      | [2.64, 3.17] | 2.82     | 1.12      | [2.54, 3.09] |
| Open and honest    | 3.71                                          | .62       | [3.55, 3.86] | 3.84     | .39       | [3.74, 3.94] | 3.49                               | .84       | [3.28, 3.69] | 3.71     | .64       | [3.55, 3.86] | 3.68              | .58       | [3.54, 3.83] | 3.68     | .57       | [3.54, 3.82] |
| Conflict           | 0.35                                          | 0.79      | [.15, .54]   | .27      | .77       | [.08, .46]   | .24                                | .70       | [.07, .41]   | .36      | .91       | [.14, .59]   | 1.04              | 1.17      | [.75, 1.32]  | 1.14     | 1.06      | [.88, 1.40]  |
| Change for better  | 1.96                                          | 1.25      | [1.66, 2.27] | 2.23     | 1.33      | [1.90, 2.56] | 2.08                               | 1.22      | [1.78, 2.38] | 2.39     | 1.25      | [2.08, 2.70] | 2.39              | 1.17      | [2.11, 2.68] | 2.55     | 1.21      | [2.26, 2.85] |
| Change for worse   | 0.12                                          | .50       | [.00, .25]   | .02      | .13       | [-.02, .05]  | .17                                | .64       | [.01, .33]   | .09      | .41       | [-.01, .19]  | .25               | .57       | [.11, .39]   | .20      | .48       | [.08, .32]   |
|                    | <b>Post-discussion Emotions</b>               |           |              |          |           |              |                                    |           |              |          |           |              |                   |           |              |          |           |              |
| Sadness            | 2.24                                          | 1.30      | [1.92, 2.56] | 1.64     | 1.50      | [1.27, 2.01] | 1.35                               | 1.36      | [1.02, 1.69] | 1.38     | 1.31      | [1.06, 1.70] | .33               | .72       | [.16, .51]   | .24      | .68       | [.07, .40]   |
| Hopelessness       | .54                                           | .95       | [.30, .78]   | .41      | .85       | [.20, .62]   | .13                                | .47       | [.02, .25]   | .27      | .71       | [.09, .44]   | .28               | .75       | [.10, .46]   | .21      | .60       | [.06, .36]   |
| Anger              | .57                                           | .95       | [.33, .80]   | .40      | .88       | [.18, .62]   | .17                                | .53       | [.04, .30]   | .22      | .65       | [.06, .38]   | .32               | .68       | [.16, .49]   | .20      | .55       | [.07, .34]   |
| Irritation         | .23                                           | .53       | [.10, .36]   | .31      | .88       | [.09, .53]   | .10                                | .30       | [.02, .17]   | .19      | .54       | [.05, .32]   | .54               | .92       | [.32, .77]   | .38      | .75       | [.19, .56]   |
|                    | <b>Post-discussion Relationship Closeness</b> |           |              |          |           |              |                                    |           |              |          |           |              |                   |           |              |          |           |              |
| Closeness          | 2.71                                          | 1.57      | [2.32, 3.09] | 3.07     | 1.41      | [2.72, 3.42] | 2.88                               | 1.50      | [2.51, 3.25] | 3.08     | 1.32      | [2.76, 3.40] | 2.47              | 1.73      | [2.05, 2.90] | 2.79     | 1.53      | [2.41, 3.17] |
|                    | <b>Physiological Reactivity</b>               |           |              |          |           |              |                                    |           |              |          |           |              |                   |           |              |          |           |              |
| SCR reactivity     | 1.57                                          | 1.60      | [1.15, 1.98] | 1.67     | 1.54      | [1.26, 2.07] | 1.12                               | 1.63      | [.68, 1.55]  | 1.34     | 1.43      | [.97, 1.71]  | 1.84              | 1.53      | [1.44, 2.24] | 2.13     | 1.40      | [1.76, 2.49] |
| SCR slope          | -.11                                          | .34       | [-.20, -.03] | .01      | .34       | [-.08, .10]  | .10                                | .34       | [.02, .19]   | .06      | .33       | [-.02, .15]  | -.07              | .35       | [-.16, .01]  | -.11     | .35       | [-.20, -.02] |

*Note.* CI indicates 99% confidence interval. Neg anticipation = Negative anticipation. Similarity = Similarity to other discussions outside the lab. . Closeness = Ratings of feeling close minus feeling distant. SCR reactivity = mean SCR during the discussion minus mean SCR during relaxation baseline. SCR slope = Fisher transformed correlation coefficients between SCR per 30 second interval and time.

**Supplemental Table 2**

*Correlations Between Pre- and Post-Discussion Appraisals, Post-Discussion Reactions, and SCRs During Own Loss (Narrator) Discussion, Partner Loss (Listener) Discussion, and Change Discussions*

| <i>Own Loss (Narrator)</i>     | 1      | 2     | 3     | 4     | 5      | 6      | 7      | 8      | 9     | 10    | 11     | 12     | 13     | 14   | 15   |
|--------------------------------|--------|-------|-------|-------|--------|--------|--------|--------|-------|-------|--------|--------|--------|------|------|
| 1. Neg anticipation            | -      | .03   | -.18  | -.26* | -.34** | .08    | -.31*  | .07    | .19   | .18   | .18    | .15    | -.20   | .05  | -.05 |
| 2. Expressed new info          | .06    | -     | .19   | -.19  | .17    | -.01   | .31*   | .14    | .31*  | .07   | .14    | .05    | .18    | -.04 | .04  |
| 3. Learned new info            | -.12   | .35** | -     | .05   | .18    | -.14   | .41**  | -.15   | .01   | -.03  | .00    | .10    | .32*   | -.09 | .11  |
| 4. Similarity                  | -.29*  | -.17  | -.09  | -     | .14    | -.03   | .04    | -.17   | -.04  | .12   | .10    | .09    | .18    | -.20 | .02  |
| 5. Open and honest             | -.26*  | .21   | .10   | .24   | -      | -.42** | .35**  | -.12   | .16   | .09   | .11    | .12    | .40**  | .08  | -.16 |
| 6. Conflict                    | .11    | .02   | .06   | -.15  | -.12   | -      | -.08   | .39**  | .04   | .09   | .09    | -.09   | -.23   | .10  | .03  |
| 7. Change for better           | -.29*  | .37** | .37** | .14   | .23    | -.05   | -      | -.08   | .15   | -.01  | .11    | .15    | .34**  | .01  | -.03 |
| 8. Change for worse            | .02    | -.13  | -.02  | -.14  | .00    | .48**  | -.14   | -      | .03   | .25*  | .17    | -.05   | -.25*  | -.03 | -.01 |
| 9. Sadness                     | .21    | .21   | -.04  | -.07  | .04    | .01    | .08    | -.24   | -     | .35** | .35**  | .12    | .19    | -.03 | -.13 |
| 10. Hopelessness               | .13    | -.08  | -.10  | .03   | -.06   | .26*   | -.20   | .03    | .36** | -     | .40**  | .22    | -.05   | .03  | -.14 |
| 11. Anger                      | .25*   | -.07  | -.01  | -.06  | -.17   | .24    | -.11   | .28*   | .20   | .39** | -      | .53**  | .14    | -.05 | .02  |
| 12. Irritation                 | .17    | .12   | -.01  | -.01  | -.20   | .15    | -.07   | .06    | -.09  | .19   | .30*   | -      | .11    | -.00 | -.08 |
| 13. Closeness                  | -.30*  | .13   | .04   | .24*  | .44**  | -.45** | .31*   | -.31*  | .14   | -.23  | -.21   | -.15   | -      | .03  | .11  |
| 14. SCR reactivity             | .02    | -.08  | -.26  | -.10  | -.14   | .12    | .04    | -.04   | .10   | .13   | .15    | .01    | -.04   | -    | .06  |
| 15. SCR slope                  | .08    | -.15  | -.06  | -.16  | .02    | .10    | -.14   | .16    | .02   | -.07  | -.02   | -.18   | -.11   | .06  | -    |
| <i>Partner Loss (Listener)</i> |        |       |       |       |        |        |        |        |       |       |        |        |        |      |      |
| 1. Neg anticipation            | -      | -.06  | -.21  | -.04  | -.22   | .05    | -.48** | .01    | .12   | .13   | .13    | .05    | -.35** | -.09 | .03  |
| 2. Expressed new info          | -.03   | -     | .38** | -.13  | .08    | .26*   | .32**  | .18    | .10   | -.15  | .15    | .21    | .06    | -.01 | -.02 |
| 3. Learned new info            | -.15   | .37** | -     | -.23  | .05    | .14    | .41**  | .15    | .13   | -.06  | .07    | .08    | .13    | .01  | .04  |
| 4. Similarity                  | -.25*  | -.08  | -.15  | -     | .32*   | .14    | .00    | -.11   | -.01  | -.03  | .01    | -.06   | .27*   | -.15 | -.16 |
| 5. Open and honest             | -.34** | .16   | .15   | .07   | -      | -.28*  | .17    | -.07   | .16   | -.10  | -.04   | -.20   | .49**  | .04  | -.00 |
| 6. Conflict                    | .11    | .10   | -.14  | -.16  | -.08   | -      | -.03   | .13    | -.13  | .00   | .38**  | .66**  | -.24   | .16  | .09  |
| 7. Change for better           | -.23   | .29*  | .45** | .11   | .14    | -.09   | -      | .12    | .13   | .11   | .01    | .05    | .40**  | -.04 | -.05 |
| 8. Change for worse            | .07    | .16   | .07   | .11   | .01    | .51**  | .10    | -      | .04   | -.05  | -.04   | .17    | -.05   | -.04 | -.22 |
| 9. Sadness                     | .16    | -.01  | .06   | -.05  | -.02   | -.11   | .05    | -.11   | -     | .21   | .07    | -.13   | .24    | -.08 | -.06 |
| 10. Hopelessness               | .03    | .19   | .09   | .14   | .08    | .31*   | .01    | .37**  | .05   | -     | .10    | .01    | -.00   | -.02 | -.04 |
| 11. Anger                      | .06    | .09   | .04   | .09   | -.05   | .42**  | .03    | .36**  | .05   | .12   | -      | .72**  | .10    | .05  | .12  |
| 12. Irritation                 | .01    | .05   | -.23  | .07   | -.01   | .49**  | -.07   | .34**  | -.11  | .29*  | .40**  | -      | -.03   | .02  | .02  |
| 13. Closeness                  | -.27*  | .00   | .29*  | .01   | .31*   | -.53** | .23    | -.29*  | .15   | -.18  | -.15   | -.39** | -      | -.09 | -.06 |
| 14. SCR reactivity             | .12    | .18   | .00   | -.09  | -.05   | -.02   | .03    | .03    | -.06  | .05   | .03    | .13    | .12    | -    | .13  |
| 15. SCR slope                  | .05    | .02   | -.05  | .05   | -.05   | -.00   | -.05   | -.04   | .05   | .02   | .02    | -.04   | -.10   | -.16 | -    |
| <i>Change</i>                  |        |       |       |       |        |        |        |        |       |       |        |        |        |      |      |
| 1. Neg anticipation            | -      | -.09  | .06   | -.13  | -.30*  | .17    | -.33** | .26*   | .35** | .22   | .21    | .24*   | -.27*  | -.06 | .03  |
| 2. Expressed new info          | -.08   | -     | .60** | -.05  | .20    | .06    | .39**  | .01    | -.05  | -.19  | -.10   | -.07   | .12    | -.05 | .03  |
| 3. Learned new info            | -.03   | .54** | -     | -.05  | .20    | .06    | .52**  | -.01   | .12   | -.17  | -.13   | -.02   | .22    | -.01 | .15  |
| 4. Similarity                  | -.29*  | -.09  | -.27* | -     | .16    | -.09   | .05    | -.19   | -.05  | -.07  | -.01   | -.09   | .22    | -.21 | -.05 |
| 5. Open and honest             | -.19   | .08   | .07   | .17   | -      | -.16   | .41**  | -.35** | -.10  | -.32* | -.19   | -.21   | .46**  | .02  | .12  |
| 6. Conflict                    | .24*   | -.13  | -.12  | -.01  | -.23   | -      | -.18   | .38**  | .31*  | .18   | .36**  | .45**  | -.29*  | .01  | .19  |
| 7. Change for better           | -.33** | .31*  | .37** | .06   | .20    | -.45** | -      | -.27*  | -.12  | -.19  | -.33** | -.28*  | .51**  | .10  | .09  |
| 8. Change for worse            | .17    | -.13  | -.19  | -.09  | -.08   | .46**  | -.38** | -      | .26*  | .34** | .41**  | .50**  | -.41** | -.01 | .08  |
| 9. Sadness                     | .16    | -.02  | .16   | -.11  | -.25*  | .29*   | -.22   | .25*   | -     | .24*  | .34**  | .40**  | -.16   | -.16 | .09  |
| 10. Hopelessness               | .08    | -.11  | -.03  | -.06  | -.06   | .41**  | -.33** | .46**  | .38** | -     | .32**  | .41**  | -.32*  | -.03 | .09  |

|                    | 1     | 2    | 3    | 4    | 5    | 6      | 7      | 8      | 9      | 10     | 11     | 12     | 13     | 15   | 16   |
|--------------------|-------|------|------|------|------|--------|--------|--------|--------|--------|--------|--------|--------|------|------|
| 11. Anger          | .27*  | -.10 | -.11 | -.03 | -.16 | .68**  | -.45** | .49**  | .46**  | .43**  | -      | .70**  | -.42** | -.11 | -.09 |
| 12. Irritation     | .22   | -.03 | -.12 | -.15 | -.22 | .70**  | -.49** | .47**  | .44**  | .38**  | .74**  | -      | -.50** | -.03 | -.01 |
| 13. Closeness      | -.29* | .17  | .13  | .05  | .27* | -.65** | .55**  | -.61** | -.39** | -.43** | -.66** | -.67** | -      | .02  | .11  |
| 14. SCR reactivity | .07   | .16  | -.02 | -.02 | -.13 | .08    | .04    | -.11   | .10    | -.15   | .10    | .07    | .02    | -    | .10  |
| 15. SCR slope      | -.00  | -.02 | -.09 | .05  | -.01 | -.03   | -.05   | -.07   | -.01   | -.04   | -.01   | -.02   | -.04   | .00  | -    |

*Note.* Coefficients for women are below the diagonal, coefficients for men are above the diagonal. Neg anticipation = Negative anticipation. Similarity = Similarity to other discussions outside the lab. Closeness = Ratings of feeling close minus feeling distant. SCR reactivity = mean SCR during the discussion minus mean SCR during relaxation baseline. SCR slope = Fisher transformed correlation coefficients between SCR per 30 second interval and time. \*  $p < .01$ , \*\*  $p < .001$ .

**Supplemental Table 3**

*Comparisons in Pre- and Post-Discussion Appraisals Between Own (O) Loss Discussion, Partner’s (P) Loss Discussion and Change Discussions*

| Variable            | Negative anticipation |           |                |          |          | Expressed new information |           |              |          |          |
|---------------------|-----------------------|-----------|----------------|----------|----------|---------------------------|-----------|--------------|----------|----------|
|                     | <i>b</i>              | <i>SE</i> | 99% CI         | <i>z</i> | <i>p</i> | <i>b</i>                  | <i>SE</i> | 99% CI       | <i>z</i> | <i>p</i> |
| O Loss vs Change    | 0.26                  | 0.09      | [0.04, 0.48]   | 2.99     | .003     | 0.51                      | .10       | [.25, .76]   | 5.05     | <.001    |
| P Loss vs Change    | -0.33                 | .08       | [-0.54, -0.11] | -3.95    | <.001    | -.18                      | .09       | [-.42, .06]  | -1.97    | .049     |
| P Loss vs O Loss    | -0.58                 | .07       | [-0.76, -0.40] | -8.39    | <.001    | -.69                      | .11       | [-.96, -.41] | -6.46    | <.001    |
| Sex                 | -.39                  | .11       | [-0.68, -0.10] | -3.46    | .001     | .09                       | .10       | [-.18, .35]  | 0.88     | .382     |
| Relationship length | .01                   | .00       | [-0.00, 0.01]  | 1.65     | .099     | .00                       | .00       | [-.01, .01]  | 0.46     | .648     |
| Cohabitation        | .03                   | .13       | [-0.30, 0.37]  | 0.25     | .803     | -.07                      | .11       | [-.36, .23]  | -0.57    | .568     |
| R <sup>2</sup>      | 6.83%                 |           |                |          |          | 5.72%                     |           |              |          |          |

  

| Variable            | Learned new information |           |              |          |          | Similar to other discussions |           |               |          |          |
|---------------------|-------------------------|-----------|--------------|----------|----------|------------------------------|-----------|---------------|----------|----------|
|                     | <i>b</i>                | <i>SE</i> | 99% CI       | <i>z</i> | <i>p</i> | <i>b</i>                     | <i>SE</i> | 99% CI        | <i>z</i> | <i>p</i> |
| O Loss vs Change    | -.39                    | .11       | [-.66, -.12] | -3.67    | <.001    | -.89                         | .10       | [-1.14, -.65] | -9.32    | <.001    |
| P Loss vs Change    | .62                     | .09       | [.38, .86]   | 6.65     | <.001    | -.75                         | .10       | [-1.02, -.49] | -7.29    | <.001    |
| P Loss vs O Loss    | 1.01                    | .11       | [.72, 1.30]  | 8.93     | <.001    | .14                          | .08       | [-.06, .35]   | 1.78     | .075     |
| Sex                 | -.10                    | .09       | [-.34, .14]  | -1.09    | .274     | .13                          | .10       | [-.13, .40]   | 1.33     | .185     |
| Relationship length | .00                     | .00       | [-.00, .01]  | 0.88     | .380     | -.00                         | .00       | [-.01, .01]   | -0.24    | .813     |
| Cohabitation        | .09                     | .12       | [-.22, .39]  | 0.71     | .480     | .02                          | .14       | [-.34, .39]   | 0.16     | .872     |
| R <sup>2</sup>      | 11.39%                  |           |              |          |          | 9.60%                        |           |               |          |          |

  

| Variable            | Open and honest |           |              |          |          | Amount of conflict |           |               |          |          |
|---------------------|-----------------|-----------|--------------|----------|----------|--------------------|-----------|---------------|----------|----------|
|                     | <i>b</i>        | <i>SE</i> | 99% CI       | <i>z</i> | <i>p</i> | <i>b</i>           | <i>SE</i> | 99% CI        | <i>z</i> | <i>p</i> |
| O Loss vs Change    | .09             | .04       | [-.02, .20]  | 2.17     | .030     | -.78               | .08       | [-.99, -.58]  | -9.72    | <.001    |
| P Loss vs Change    | -.09            | .05       | [-.21, .04]  | -1.85    | .065     | -.79               | .08       | [-1.00, -.57] | -9.49    | <.001    |
| P Loss vs O Loss    | -.18            | .05       | [-.32, -.04] | -3.41    | .001     | -.01               | .05       | [-.14, .13]   | -0.09    | .927     |
| Sex                 | .12             | .06       | [-.04, .28]  | 1.98     | .048     | .05                | .06       | [-.11, .21]   | 0.81     | .415     |
| Relationship length | .00             | .00       | [-.00, .00]  | 1.00     | .319     | .01                | .00       | [.00, .01]    | 2.36     | .018     |
| Cohabitation        | .05             | .06       | [-.11, .20]  | 0.76     | .447     | .08                | .11       | [-.21, .38]   | 0.71     | .477     |
| R <sup>2</sup>      | 2.04%           |           |              |          |          | 14.55%             |           |               |          |          |

  

| Variable            | Change for better |           |              |          |          | Change for worse |           |              |          |          |
|---------------------|-------------------|-----------|--------------|----------|----------|------------------|-----------|--------------|----------|----------|
|                     | <i>b</i>          | <i>SE</i> | 99% CI       | <i>z</i> | <i>p</i> | <i>b</i>         | <i>SE</i> | 99% CI       | <i>z</i> | <i>p</i> |
| O Loss vs Change    | -.38              | .09       | [-.61, -.15] | -4.30    | <.001    | -.15             | .04       | [-.25, -.06] | -4.12    | <.001    |
| P Loss vs Change    | -.24              | .08       | [-.45, -.02] | -2.83    | .005     | -.09             | .04       | [-.21, .02]  | -2.12    | .034     |
| P Loss vs O Loss    | .14               | .07       | [-.05, .33]  | 1.95     | .052     | .06              | .04       | [-.04, .16]  | 1.59     | .111     |
| Sex                 | .24               | .11       | [-.04, .53]  | 2.19     | .029     | -.08             | .04       | [-.18, .02]  | -2.03    | .042     |
| Relationship length | .00               | .00       | [-.01, .01]  | 0.79     | .431     | .00              | .00       | [-.00, .00]  | 1.04     | .296     |
| Cohabitation        | -.04              | .16       | [-.45, .37]  | -0.26    | .799     | .04              | .05       | [-.10, .17]  | 0.67     | .501     |
| R <sup>2</sup>      | 2.38%             |           |              |          |          | 2.10%            |           |              |          |          |

*Note.* Number of observations = 684. Negative anticipation was reported prior to each discussion and all other constructs were reported after each discussion. O Loss vs Change, P Loss vs Change, and P Loss vs O Loss are level 1 variables; Sex is a level 2 variable; and Relationship Length and Cohabitation are Level 3 covariates.

**Supplemental Table 4**

*Comparisons in SCR (Skin Conductance Response) Across Time (Slope) Between Own (O) Loss Discussion, Partner’s (P) Loss Discussion and Change Discussions*

| Variable                                  | SCR      |           |                |          |          |
|-------------------------------------------|----------|-----------|----------------|----------|----------|
|                                           | <i>b</i> | <i>SE</i> | 95% CI         | <i>z</i> | <i>p</i> |
| <b>Level 1 predictors</b>                 |          |           |                |          |          |
| Time                                      | -0.02    | 0.01      | [-0.04, -0.01] | -2.66    | .008     |
| O Loss vs Change                          | -0.17    | 0.17      | [-0.50, 0.16]  | -1.02    | .306     |
| P Loss vs Change                          | -1.10    | 0.17      | [-1.43, -0.77] | -6.52    | <.001    |
| P Loss vs O Loss                          | -0.93    | 0.17      | [-1.26, -0.59] | -5.41    | <.001    |
| <b>Level 2 predictors</b>                 |          |           |                |          |          |
| Sex                                       | 0.55     | 0.18      | [0.19, 0.91]   | 3.02     | .003     |
| Mean SCR during relaxation                | 0.31     | 0.10      | [0.13, 0.50]   | 3.31     | .001     |
| <b>Level 3 covariates</b>                 |          |           |                |          |          |
| Relationship length                       | 0.01*    | 0.00      | [0.00, 0.01]   | 2.53     | .012     |
| Cohabitation                              | -0.08    | 0.16      | [-0.39, 0.22]  | -0.54    | .591     |
| <b>Two-way cross-level interactions</b>   |          |           |                |          |          |
| Time*O Loss vs Change                     | -0.01    | 0.01      | [-0.03, 0.01]  | -0.83    | .408     |
| Time*P Loss vs Change                     | 0.04     | 0.01      | [0.02, 0.07]   | 3.83     | <.001    |
| Time*P Loss vs O Loss                     | 0.05     | 0.01      | [0.03, 0.07]   | 4.77     | <.001    |
| Time*Sex                                  | -0.00    | 0.01      | [-0.02, 0.02]  | -0.21    | .832     |
| O Loss vs Change*Sex                      | -0.56    | 0.22      | [-0.99, -0.12] | -2.51    | .012     |
| P Loss vs Change*Sex                      | -0.10    | 0.22      | [-0.54, 0.33]  | -0.47    | .639     |
| P Loss vs O Loss*Sex                      | 0.45     | 0.24      | [-0.01, 0.92]  | 1.91     | .056     |
| <b>Three-way cross-level interactions</b> |          |           |                |          |          |
| Time*O Loss vs Change*Sex                 | 0.04     | 0.02      | [0.00, 0.07]   | 2.18     | .029     |
| Time*P Loss vs Change*Sex                 | -0.00    | 0.02      | [-0.03, 0.03]  | -0.10    | .923     |
| Time*P Loss vs O Loss*Sex                 | -0.04    | 0.02      | [-0.07, -0.00] | -2.19    | .029     |
| <b>R<sup>2</sup></b>                      |          |           | <b>3.58%</b>   |          |          |

*Note.* Number of observations = 13680. All cross-level interactions are between Level 1 and Level 2 variab

**Supplemental Table 5**

*Mean Differences in Post-Discussion Reactions According to Congruence vs. Incongruence in Narrator’s (N) and Listener’s (L) Skin Conductance Response (SCR) Slopes during the Loss Discussions*

| Variable                  | Closeness – Her Loss |           |               |          |          | Closeness – His Loss |           |               |          |          |
|---------------------------|----------------------|-----------|---------------|----------|----------|----------------------|-----------|---------------|----------|----------|
|                           | <i>b</i>             | <i>SE</i> | 95% CI        | <i>z</i> | <i>p</i> | <i>b</i>             | <i>SE</i> | 95% CI        | <i>z</i> | <i>p</i> |
| Listener vs. narrator     | 0.37                 | 0.15      | [0.08, 0.66]  | 2.53     | .012     | -0.20                | 0.17      | [-0.52, 0.13] | -1.20    | .232     |
| N ↓ - L ↓ vs N ↑ - L ↑    | 0.78                 | 0.35      | [0.09, 1.47]  | 2.22     | .027     | 0.15                 | 0.28      | [-0.40, 0.70] | 0.54     | .592     |
| N ↓ - L ↓ vs. Incongruent | 0.66                 | 0.25      | [0.17, 1.14]  | 2.66     | .008     | 0.19                 | 0.28      | [-0.35, 0.73] | 0.68     | .498     |
| N ↑ - L ↑ vs. Incongruent | -0.12                | 0.35      | [-0.80, 0.55] | -0.36    | .719     | 0.04                 | 0.28      | [-0.50, 0.58] | 0.13     | .894     |
| Relationship length       | 0.00                 | 0.01      | [-0.01, 0.01] | -0.22    | .827     | 0.00                 | 0.01      | [-0.01, 0.01] | -0.70    | .484     |
| Cohabitation              | -0.03                | 0.24      | [-0.50, 0.43] | -0.13    | .893     | 0.24                 | 0.21      | [-0.18, 0.66] | 1.12     | .262     |
| R <sup>2</sup>            | 7.02%                |           |               |          |          | 0.77%                |           |               |          |          |

*Note:* N ↓ - L ↓ signifies the group of couples with both Narrator and Listener having decreasing SCR slopes; N ↑ - L ↑ signifies the group of couples with both Narrator and Listener having increasing SCR slopes; Incongruent signifies couples with one partner having an increasing SCR slope and the other having a decreasing SCR slope. Closeness = Rating of feeling close minus rating of feeling distant. Role (Listener vs. Narrator) is a level 1 variable. All slope group contrasts as well as Relationship length and Cohabitation are level 2 variables.
